# Supplementary material for: A focused ion beam-fabricated high-performance electrodeposited nickel–ruthenium–ruthenium oxide nano-supercapacitor
Source: Royal Society of Chemistry journal article supplement (doi:10.1039/d4ta03734k), 2024-01-01
Supplement: d4ta03734k1.pdf [file d4ta03734k1.pdf]

## Supporting Information

### Focused ion beam-fabricated high-performance nickel-ruthenium nano-supercapacitor

Sudipta Biswas<sup>a</sup>, Ahiud Morag<sup>b,c</sup>, Nitzan Shauloff<sup>a</sup>, Nitzan Maman<sup>d</sup>, and Raz Jelinek<sup>a,d \*</sup>

<sup>a</sup>Department of Chemistry, Ben Gurion University of the Negev, Beer Sheva 8410501, Israel

E-mail: razj@bgu.ac.il

<sup>b</sup>Center for Advancing Electronics Dresden (CFAED) & Faculty of Chemistry and Food Chemistry, Technische Universität Dresden, Mommsenstrasse 4, Dresden 01069, Germany

<sup>c</sup>Department of Synthetic Materials and Functional Devices, Max-Planck Institute of Microstructure Physics, Halle 06120, Germany

<sup>d</sup>Ilse Katz Institute for Nanotechnology, Ben Gurion University of the Negev  
Beer Sheva 8410501, Israel

**Keywords:** focused ion beam; nano-supercapacitors; AC line filters; nickel-ruthenium alloy; ruthenium oxide

**Table 1:** Comparison of electrochemical parameters in previous reports with the present work

| Previous works | Material                | Scan rate (V s <sup>-1</sup> ) | Performance                                            | Cycling stability (%) | ESR ( $\Omega$ cm <sup>2</sup> ) | Year |
|----------------|-------------------------|--------------------------------|--------------------------------------------------------|-----------------------|----------------------------------|------|
| [25]           | MoTe <sub>2</sub> (FIB) | 0.01                           | 7.33 mF cm <sup>-2</sup>                               | 95                    | 0.035                            | 2015 |
| [26]           | MXene/CNT (FIB)         | 0.5                            | 0.035 mF cm <sup>-2</sup>                              | 80                    |                                  | 2021 |
| [35]           | Ppy-CNT@rGO             | 0.1                            | 33 mF cm <sup>-2</sup>                                 | 89.3                  | .28                              | 2023 |
| [36]           | nanoporous gold         | 1                              | 1.5 mF cm <sup>-2</sup>                                | 92                    |                                  | 2019 |
| [37]           | MXene, MWCNT            | 1                              | 10 mF/cm <sup>-2</sup>                                 |                       |                                  | 2019 |
| [38]           | organohydrogel          | 0.2                            | 1.5 mA cm <sup>-2</sup><br>(0.15 mF cm <sup>-2</sup> ) |                       | 0.04                             | 2023 |
| This work      | NiRuKI                  | 10                             | 10.5 mF cm <sup>-2</sup>                               | 94                    | 0.047                            |      |
| This work      | NiRuKI                  | 0.01                           | 28.26 mF cm <sup>-2</sup>                              |                       |                                  |      |

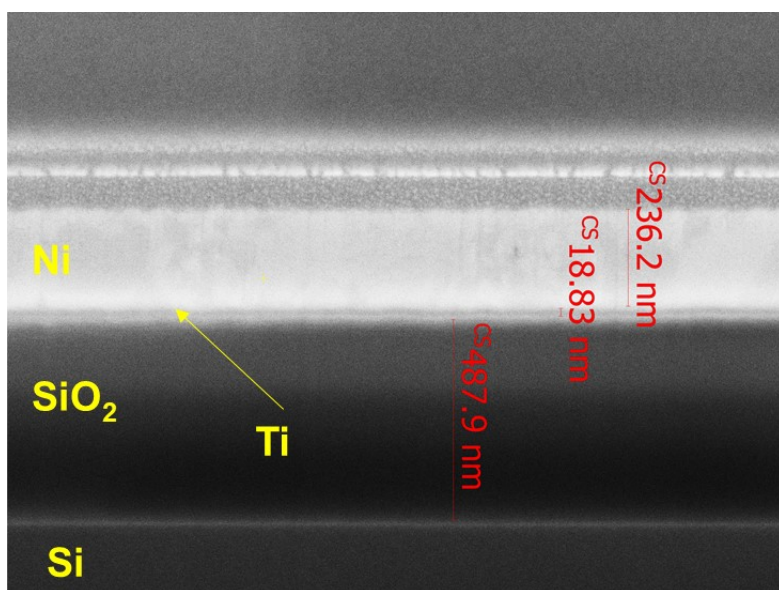

**Figure S1.** SEM micrograph of cross-sectional view of as fabricated Ni electrode before electrodeposition of NiRu alloy.

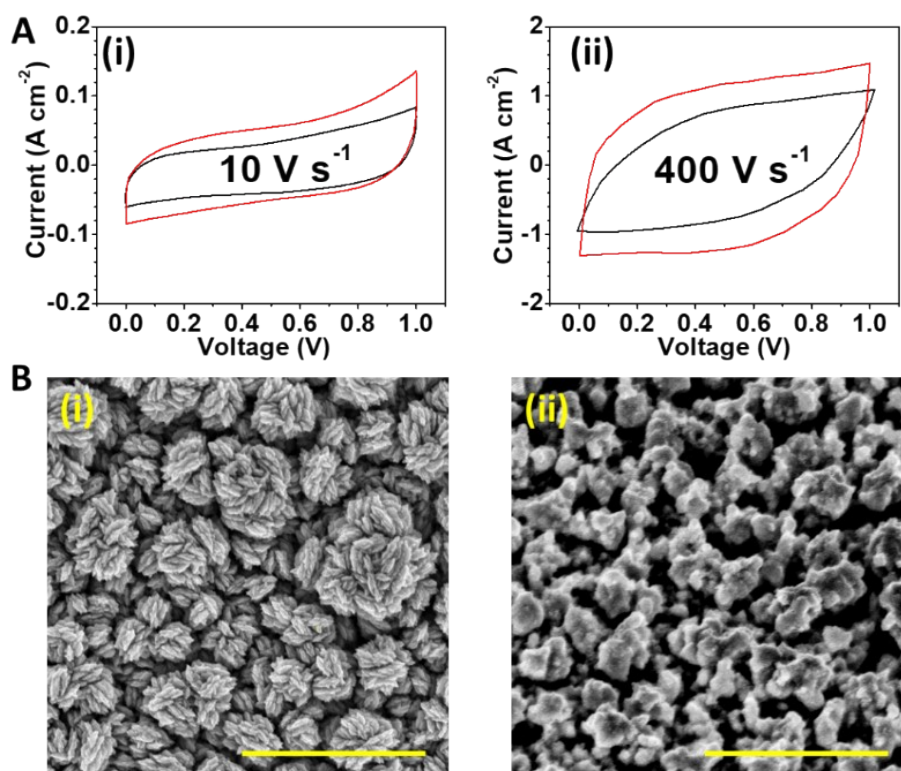

**Figure S2.** A. CV comparison of the device deposited with (red curve)/without KI (black curve). B. SEM showing higher porosity in deposition with KI (ii) compared to deposition without KI (i) (scale-bar corresponds to  $1\ \mu m$ ).

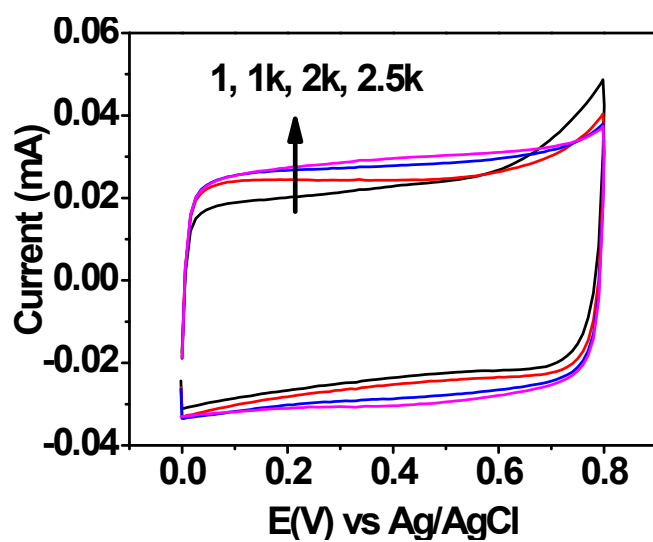

**Figure S3:** Electrochemical oxidation of Ru. CV curves at different stages of the oxidation showing a mild change of the curve indicating partial oxidation of the Ru. With oxidation CV became more rectangular indication improvement in capacitance.

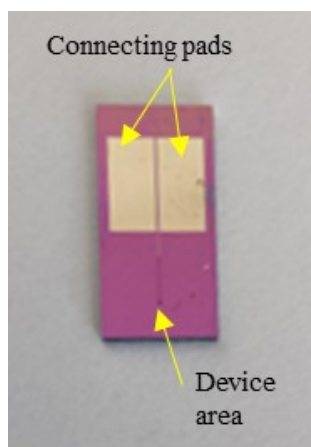

**Figure S4:** A single device on a silicon wafer where two connecting pads are visible.

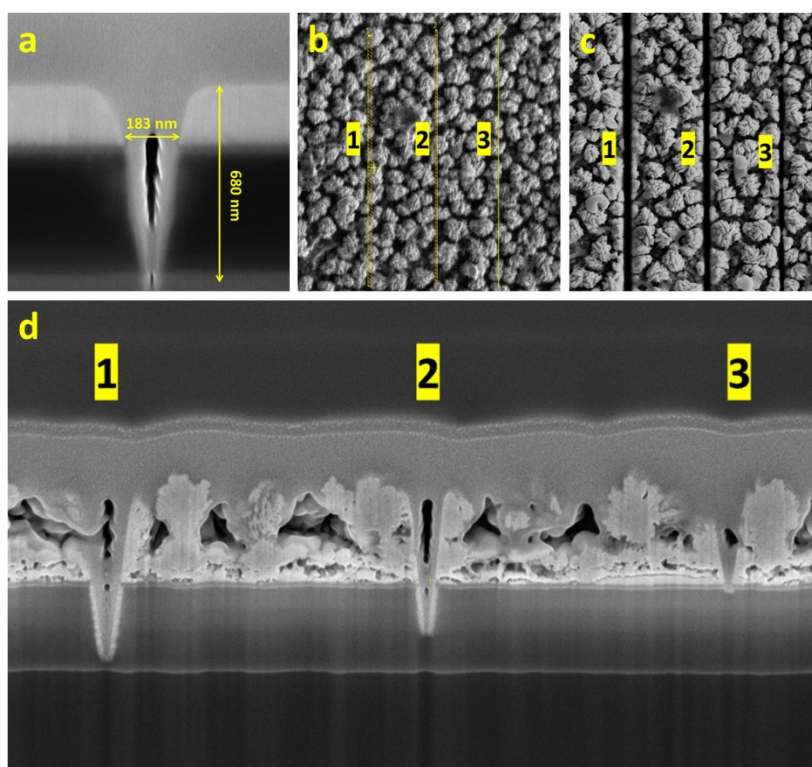

**Figure S5:** a. Vertical cross-section of trench after FIB. b-c. Trench 1, 2, 3 created with FIB having varying width with fix FIB operational parameters (viz. beam size, operation current, acceleration voltage, dwell time, etc.). Trench 1, 2 and 3 are created with width 200 nm, 100 nm, 60 nm. This shows when we go for the trench width less 100 nm there is a chance of shorting between the electrode as at 3<sup>rd</sup> trench, it do not penetrate the nonconducting SiO<sub>2</sub> surface. Also, at this lower trench width some shorting also appeared at top as encircled with yellow circle.

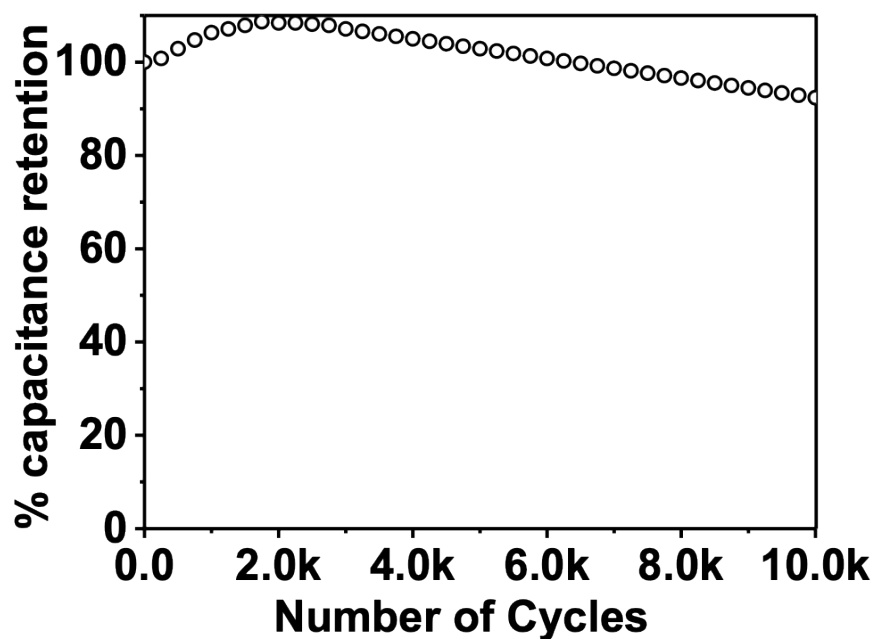

**Figure S6:** Cycle stability. Capacitance retention as a function of cycle number for NiRu/RuO<sub>2</sub> nano-device using CV measurements at a scan rate of 10 V s<sup>-1</sup> in a voltage window of 1 V with aqueous electrolyte.
